# Supplementary material for: Dietary Marine Hydrolysate Improves Memory Performance and Social Behavior through Gut Microbiota Remodeling during Aging
Source: MDPI journal article supplement (doi:10.3390/foods12234199), 2023-11-21
Supplement: s1 [file s1]

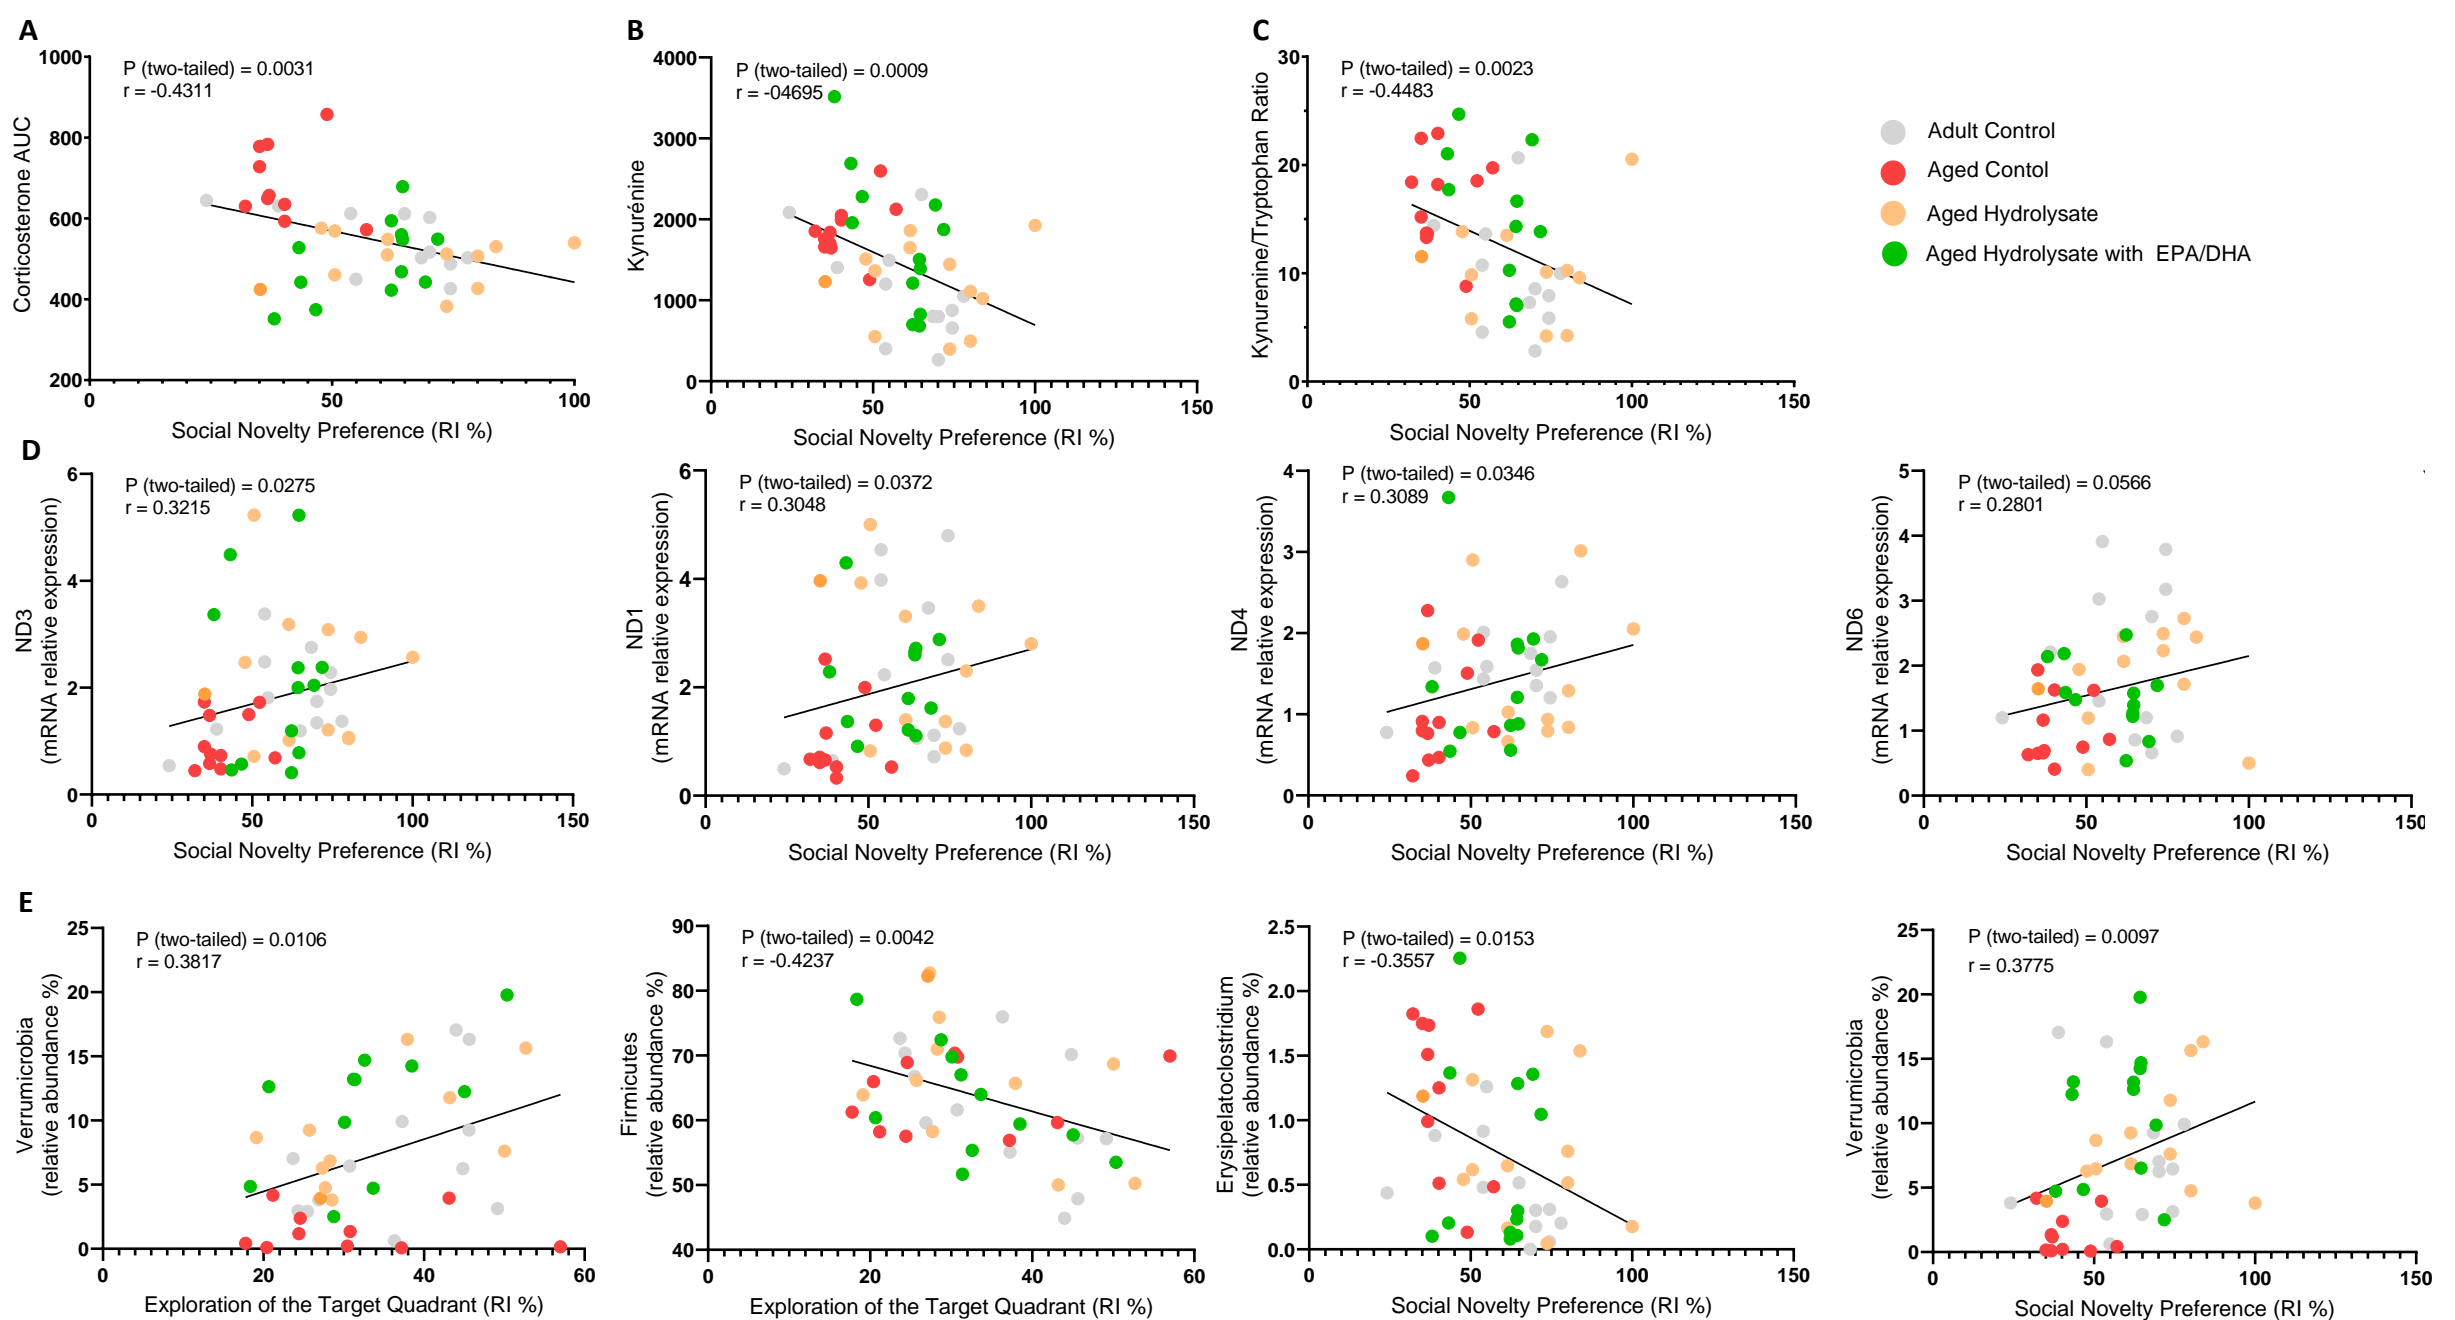

Supplementary Figure S1. Preference for social novelty and memory performance correlate with (A) AUC of corticosterone. (B) Plasmatic level of Kynurenine. (C) Kynurenine/Tryptophan ratio. (D) Gene expression of complex 1 of the mitochondrial respiratory chain and (E) Gut microbiota composition.
